# Supplementary figures and images for: Cathepsin D expression level affects alpha-synuclein processing, aggregation, and toxicity in vivo
Source: Springer Nature journal article supplement (doi:10.1186/1756-6606-2-5), 2009-02-09

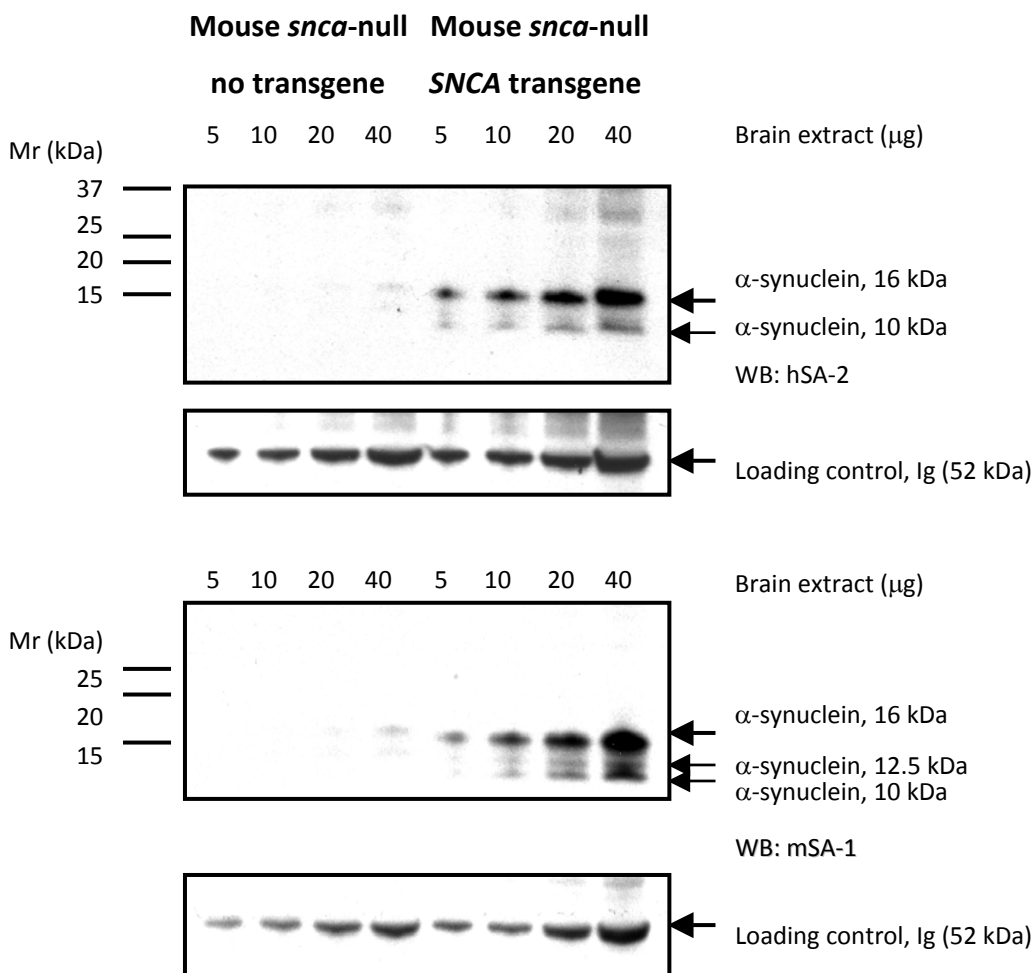

Supplementary Figure 2

Supplement: Additional file 2 [file 1756-6606-2-5-s2.pdf]
